# Supplementary material for: Rapid Emergence and Evolution of Staphylococcus aureus Clones Harboring fusC-Containing Staphylococcal Cassette Chromosome Elements
Source: PubMed Central journal article supplement (PMC4808225; doi:10.1128/aac.03020-15), 2016-03-25

Figure S1: Alignment of region surrounding orfX demonstrating the intact orfX gene in ST5 MSSA from New Zealand that are closely related to NZAK3.

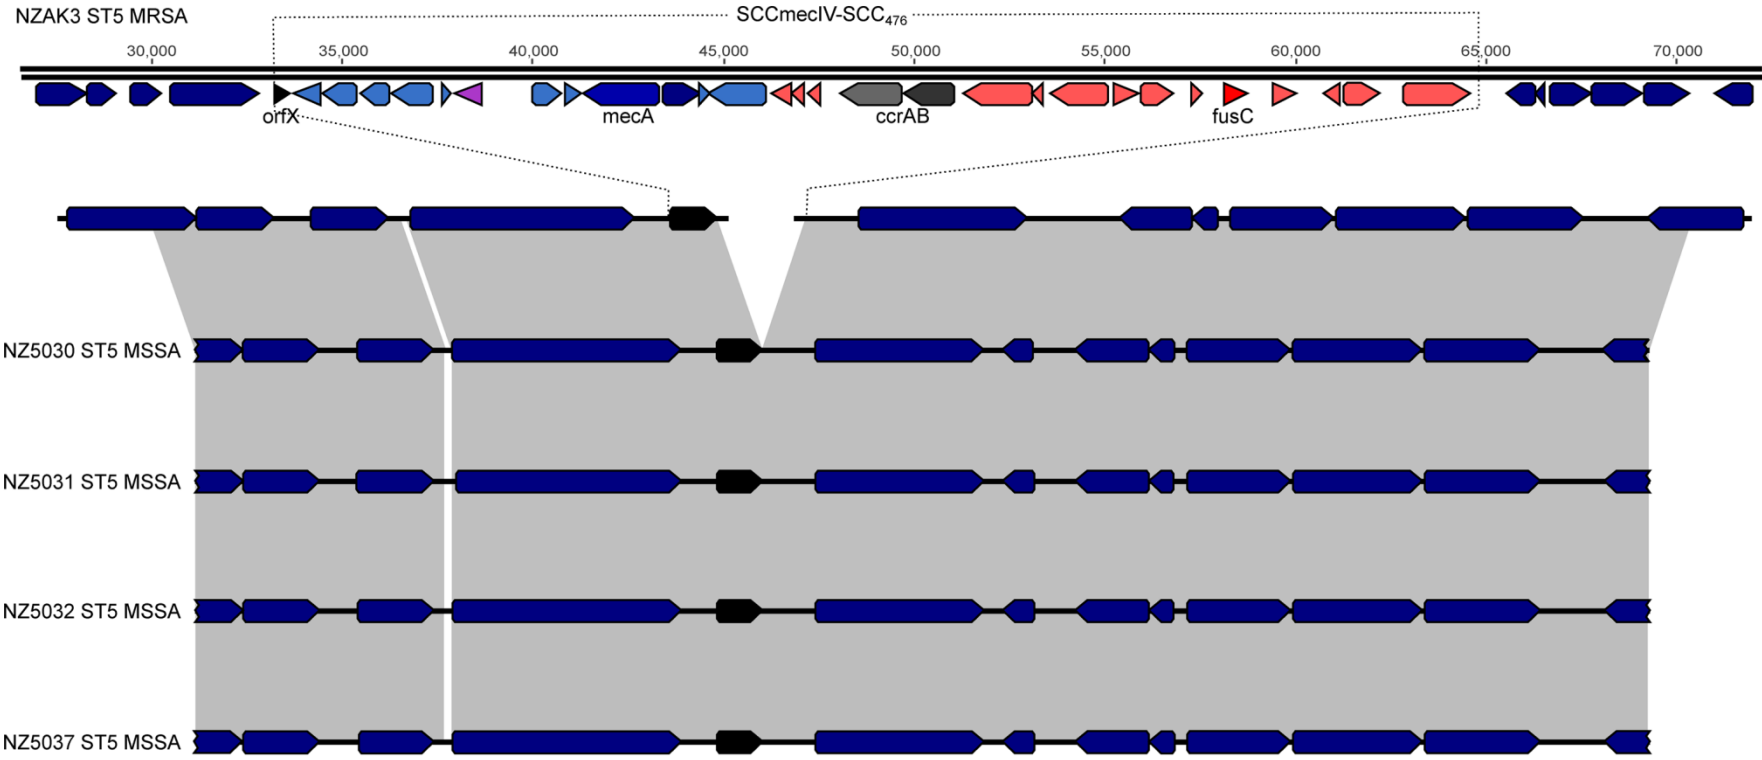

Supplement: AAC.03020-15_zac004165061so1.pdf [file AAC.03020-15_zac004165061so1.pdf]
